# Supplementary material for: Atypical lymphoplasmacytic and immunoblastic proliferation: A Systematic Review
Source: PubMed Central journal article supplement — J Clin Exp Hematop. 2024 Jun 27;64(2):97–106. doi: 10.3960/jslrt.24007 (PMC11303958; doi:10.3960/jslrt.24007), 2024-06-27
Supplement: jslrt-64-97-s001.pdf [file jslrt-64-97-s001.pdf]

## Supplementary Material

### Supplementary Appendix 1

#### Medline

(“atypical lymphoplasmacytic and immunoblastic proliferation”[All Fields] OR “atypical lymphoplasmacytic immunoblastic proliferation”[All Fields] OR “ALPIBP”[All Fields] OR “ALPIB”[All Fields])

#### EMBASE

(‘atypical lymphoplasmacytic and immunoblastic proliferation’/exp OR ‘atypical lymphoplasmacytic immunoblastic proliferation’/exp OR ‘ALPIBP’/exp OR ‘ALPIB’/exp)

### Supplementary Appendix 2

- 1 Koo CH, Nathwani BN, Winberg CD, Hill LR, Rappaport H. Atypical lymphoplasmacytic and immunoblastic proliferation in lymph nodes of patients with autoimmune disease (autoimmune-disease-associated lymphadenopathy). *Medicine (Baltimore)*. 1984; 63: 274-290.
- 2 Blanco R, McLaren B, Davis B, Steele P, Smith R. Systemic lupus erythematosus-associated lymphoproliferative disorder: report of a case and discussion in light of the literature. *Hum Pathol*. 1997; 28: 980-985.
- 3 Kojima M, Motoori T, Matsuda H, *et al*. Atypical lymphoplasmacytic and immunoblastic proliferation from systemic lupus erythematosus. A case report. *Pathol Res Pract*. 2005; 201: 531-535.
- 4 Kojima M, Motoori T, Hosomura Y, *et al*. Atypical lymphoplasmacytic and immunoblastic proliferation from rheumatoid arthritis: a case report. *Pathol Res Pract*. 2006; 202: 51-54.
- 5 Kojima M, Motoori T, Nakamura S. Benign, atypical and malignant lymphoproliferative disorders in rheumatoid arthritis patients. *Biomed Pharmacother*. 2006; 60: 663-672.
- 6 Kojima M, Motoori T, Asano S, Nakamura S. Histological diversity of reactive and atypical proliferative lymph node lesions in systemic lupus erythematosus patients. *Pathol Res Pract*. 2007; 203: 423-431.
- 7 Sato Y, Kojima M, Takata K, *et al*. Systemic IgG4-related lymphadenopathy: a clinical and pathologic comparison to multicentric Castleman’s disease. *Mod Pathol*. 2009; 22: 589-599.
- 8 Kojima M, Nakamura N, Tsukamoto N, *et al*. Atypical lymphoplasmacytic and immunoblastic proliferation of autoimmune disease: clinicopathologic and immunohistochemical study of 9 cases. *J Clin Exp Hematop*. 2010; 50: 113-119.
- 9 Nakazato Y, Tsuchida S, Takada-Owada A, *et al*. Castleman disease and mimickers: Clinicopathological findings of atypical lymphoproliferative disorders associated with autoimmune disease. *J Clin Exp Hematop*. 2022; 62: 119-126.
